# Supplementary material
Source: publisher figshare collection journal article supplement (https://acs.figshare.com/ndownloader/files/4030837)
Supplement: Supplementary file 1 [file 4030837]

### **Supporting information**

Figure 1. TGA analysis to determine the water uptake for PLGA and PVP. Spray-dried samples were exposed to a relative humidity of 60% for three hours. a. PLGA and b. PVP
